# Supplementary material for: Ionothermal synthesis of two open-framework zirconium phosphates and their gas adsorption properties
Source: Royal Society of Chemistry journal article supplement (doi:10.1039/c2dt31511d), 2012-01-01
Supplement: c2dt31511d.pdf [file c2dt31511d.pdf]

## Supporting Information

### Ionothermal synthesis of two open-framework zirconium phosphates and their gas adsorption properties

Wei Wang, Lei Liu\*, Jiangfeng Yang, Sanying Li, Jinping Li and Jinxiang Dong

**Table S1** Synthetic details and reaction results under hydrothermal conditions

| Run | Mass of reagents added (g) (molar ratio of reagents) |                                |             |                  |             | T (°C),<br>Time (h) | Product               |
|-----|------------------------------------------------------|--------------------------------|-------------|------------------|-------------|---------------------|-----------------------|
|     | ZrOCl <sub>2</sub> ·8H <sub>2</sub> O                | H <sub>3</sub> PO <sub>4</sub> | HF          | H <sub>2</sub> O | TMACl       |                     |                       |
| 1   | 0.25 (1.0)                                           | 0.09 (1.0)                     | 0.016 (1.0) | 1.4 (100)        | 0.151 (2.0) | 180,72              | ZrPOF-TMA2            |
| 2   | 0.25 (1.0)                                           | 0.09 (1.0)                     | 0.032 (2.0) | 1.4 (100)        | 0.151 (2.0) | 180,72              | ZrPOF-TMA2            |
| 3   | 0.25 (1.0)                                           | 0.18 (2.0)                     | 0.016 (1.0) | 1.4 (100)        | 0.151 (2.0) | 180,72              | ZrPOF-TMA2            |
| 4   | 0.25 (1.0)                                           | 0.18 (2.0)                     | 0.032 (2.0) | 1.4 (100)        | 0.151 (2.0) | 180,72              | ZrPOF-TMA2            |
| 5   | 0.25 (1.0)                                           | 0.18 (2.0)                     | 0.048 (3.0) | 1.4 (100)        | 0.151 (2.0) | 180,72              | ZrPOF-TMA2            |
| 6   | 0.25 (1.0)                                           | 0.18 (2.0)                     | 0.064 (4.0) | 1.4 (100)        | 0.151 (2.0) | 180,72              | no solid              |
| 7   | 0.25 (1.0)                                           | 0.27 (3.0)                     | 0.032 (2.0) | 1.4 (100)        | 0.227 (3.0) | 180,72              | ZrPOF-TMA2            |
| 8   | 0.25 (1.0)                                           | 0.36 (4.0)                     | 0.032 (2.0) | 1.4 (100)        | 0.227 (3.0) | 180,72              | ZrPOF-TMA2<br>+ α-ZrP |
| 9   | 0.25 (1.0)                                           | 0.45 (5.0)                     | 0.016 (1.0) | 1.4 (100)        | 0.151 (2.0) | 180,72              | α-ZrP                 |
| 10  | 0.25 (1.0)                                           | 0.72 (8.0)                     | 0.032 (2.0) | 1.4 (100)        | 0.151 (2.0) | 180,72              | α-ZrP                 |
| 11  | 0.25 (1.0)                                           | 0.90 (10.0)                    | 0.016 (1.0) | 1.4 (100)        | 0.227 (3.0) | 180,72              | α-ZrP                 |

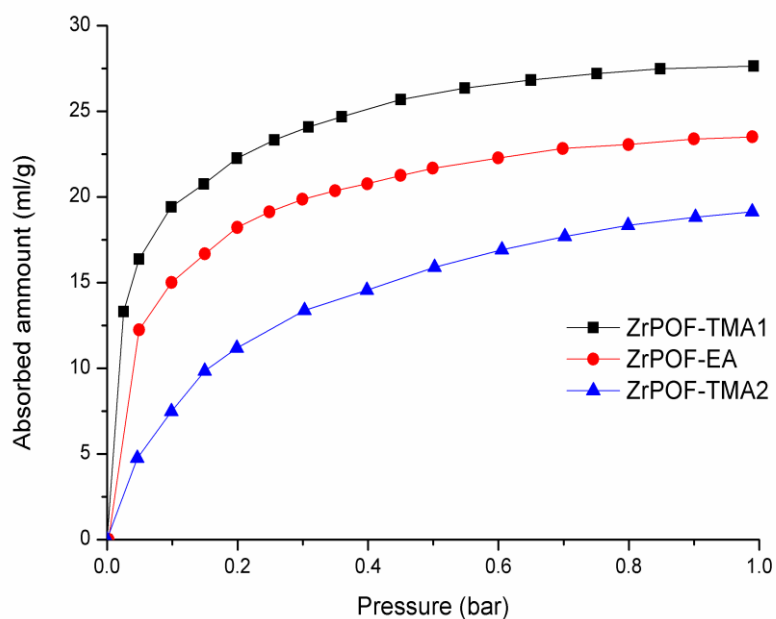

**Figure S1.** Adsorption isotherm of CO<sub>2</sub> on three different zirconium phosphate materials at 273K
